# Supplementary material for: Coordinated Changes in Mutation and Growth Rates Induced by Genome Reduction
Source: PubMed Central journal article supplement (PMC5573674; doi:10.1128/mbio.00676-17), 2017-07-05

Fig. S3

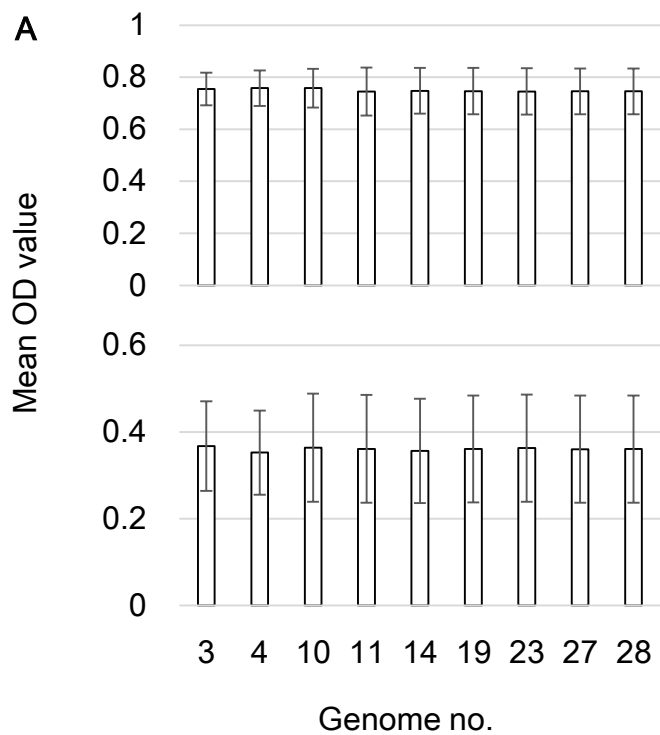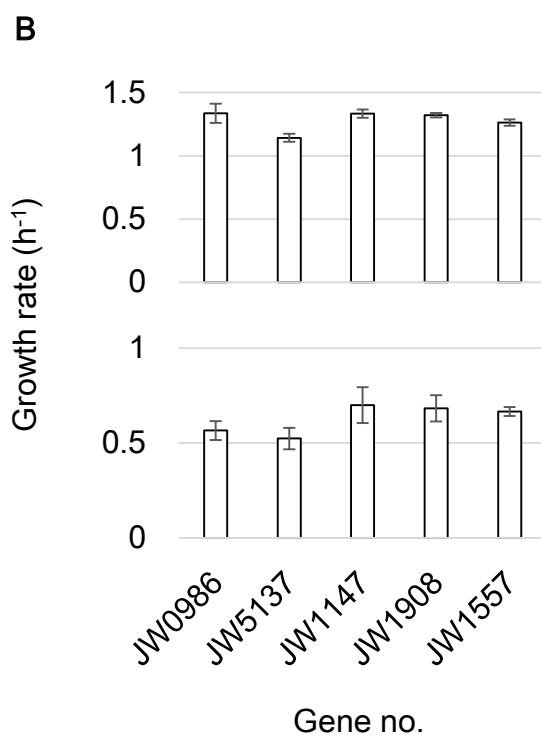

Supplement: mbo003173366sf3.pdf [file mbo003173366sf3.pdf]
